# Supplementary material for: High-performance hollow microspheres for UV protection from cinnamate-functionalized cellulose nanocrystals and inorganic nanoparticles
Source: Royal Society of Chemistry journal article supplement (doi:10.1039/d5ma00509d), 2025-11-04
Supplement: d5ma00509d1.pdf [file d5ma00509d1.pdf]

## Supporting Information

### High-Performance Hollow Microspheres for UV Protection from Cinnamate-Functionalized Cellulose Nanocrystals and Inorganic Nanoparticles

Fangyuan Ge<sup>a</sup>, Man-hin Kwok<sup>a\*</sup>, and To Ngai<sup>a\*</sup>

#### 1 FTIR Spectra for Pristine CNCs and Cin-CNCs

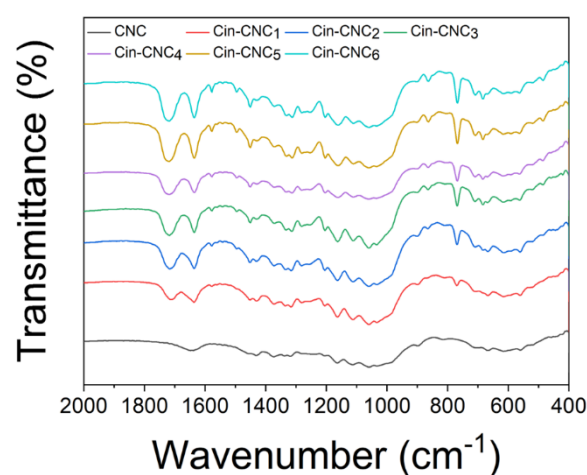

**Figure S1.** FTIR spectra of pristine CNCs and Cin-CNCs synthesized at varying weight ratios of CNCs to cinnamoyl chloride (1:1, 1:2, 1:3, 1:4, 1:5, and 1:6).

#### 2. The calibration curve and UV absorbance of a blank CNC suspension and Cin-CNCs ( $4 \times 10^{-5} \text{ g} \cdot \text{mL}^{-1}$ )

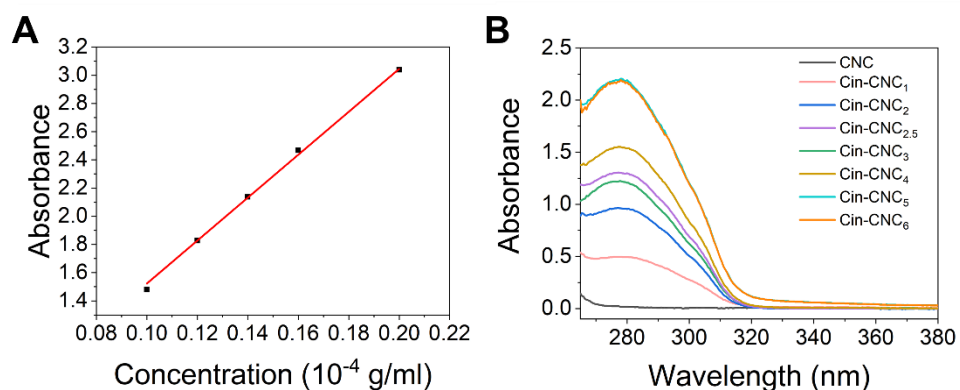

**Figure S2.** (A) Calibration curve plotting absorbance against cinnamoyl chloride concentration. (B) UV absorption spectra of CNCs and Cin-CNCs with varying grafting fractions.

### 3. Photostability of Hollow Microspheres

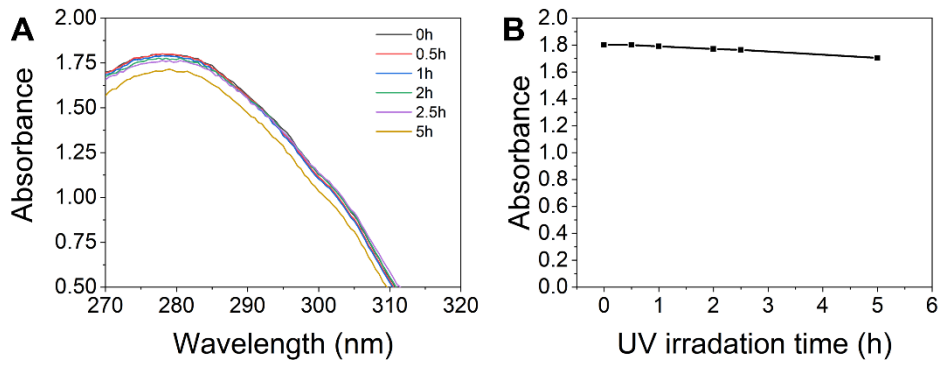

**Figure S3.** (A) Evolution of the UV absorption of Cin-CNCs/SiO<sub>2</sub> hollow microspheres irradiated at 365 nm for different durations. (B) Maximum absorbance of Cin-CNCs/SiO<sub>2</sub> hollow microspheres at 278 nm as a function of UV irradiation time.

### 4. Calculation of Grafting Fractions of Cinnamate Groups

Calibration curve derived from UV-visible spectroscopy:

$$y = 152257 \cdot x \#(1)$$

Thus ,

$$A = 152257 \cdot c_{\text{Cinnamoyl chloride}} \#(2)$$

Where  $c_{\text{cinnamoyl chloride}}$  is the concentration of cinnamoyl chloride in DMF (solvent) in g·ml<sup>-1</sup>.

After the esterification reaction, the relative molecular mass of the actual cinnamate groups grafted onto CNCs is:

$$M_{\text{Cin}} = 147 - 17 = 130 \text{ g} \cdot \text{mol}^{-1} \#(3)$$

Thus ,

$$A = 152257 \cdot c_{\text{Cin}} \cdot \frac{M_{\text{Cinnamoyl chloride}}}{M_{\text{Cin}}} = 193517 c_{\text{Cin}} \#(4)$$

Assuming that 1g of CNC can provide x moles of reacting sites for grafting cinnamate groups.

Thus ,

$$n_{\text{reacting site}} = x \cdot m_{\text{CNC}} \#(5)$$

Let  $\varphi$  be defined as the grafting fraction, which represents the ratio of the reacting sites where grafting occurs to the total reacting sites on the CNCs. The molar mass and mass of the grafted cinnamate groups can be calculated as follows:

$$n_{\text{Cin}} = \varphi \cdot n_{\text{reacting site}} = \varphi \cdot x \cdot m_{\text{CNC}} \#(6)$$

$$m_{\text{Cin}} = n_{\text{Cin}} \cdot M_{\text{Cin}} = 130 \cdot \varphi \cdot x \cdot m_{\text{CNC}} \#(7)$$

Thus , the total mass of Cin-CNCs in the dispersion used for testing is:

$$m_{\text{Cin-CNC}} = m_{\text{Cin}} + m_{\text{CNC}} = m_{\text{Cin}} + \frac{m_{\text{Cin}}}{130 \cdot \varphi \cdot x} = \left(1 + \frac{1}{130 \cdot \varphi \cdot x}\right) \cdot m_{\text{Cin}} \#(8)$$

Since the concentration of Cin-CNCs is  $4 \times 10^{-5} \text{ g} \cdot \text{ml}^{-1}$ ,

$$m_{\text{Cin-CNC}} = c_{\text{Cin-CNC}} \cdot V_{\text{sample}} \quad \#(9)$$

Thus ,

$$m_{\text{Cin}} = c_{\text{Cin}} \cdot V_{\text{sample}} = \frac{A}{193517} \cdot V_{\text{sample}} \quad \#(10)$$

Dividing both sides of equation (8) by  $V_{\text{sample}}$  and substituting equation (10):

$$0.00004 = \left(1 + \frac{1}{130 \cdot \varphi \cdot x}\right) \cdot \frac{A}{193517} \quad \#(11)$$

Substituting  $\varphi = 1$  into equation (11), where  $A = A_{\text{Cin-CNC}} - A_{\text{CNC}}$ , we obtain  $x = 0.003 \text{ mol} \cdot \text{g}^{-1}$ .

Substituting the value  $x = 0.003$  into equation (11), we can calculate the expression for  $\varphi$  :

$$\varphi = \frac{100(A_{\text{Cin-CNC}} - A_{\text{CNC}})}{302 - 39(A_{\text{Cin-CNC}} - A_{\text{CNC}})} \quad \#(12)$$

## 5. Sample Information

Table S1. Sample information.

|                                          | Sample | Oil (1 ml)              | Water (4 ml)       | Grafting Fraction of Cin-CNCs |
|------------------------------------------|--------|-------------------------|--------------------|-------------------------------|
| Effect of Cin-CNCs grafting fraction     | A1     | 0.5 w.t % Aerosil R974  | 0.5 w.t % Cin-CNCs | 0                             |
|                                          | A2     |                         |                    | 0.17                          |
|                                          | A3     |                         |                    | 0.36                          |
|                                          | A4     |                         |                    | 0.47                          |
|                                          | A5     |                         |                    | 0.51                          |
|                                          | A6     |                         |                    | 0.63                          |
|                                          | A7     |                         |                    | 1                             |
| Effect of SiO <sub>2</sub> concentration | B1     |                         | 0.5 w.t % Cin-CNCs | 0.47                          |
|                                          | B2     | 0.25 w.t % Aerosil R974 |                    |                               |
|                                          | B3     | 0.5 w.t % Aerosil R974  |                    |                               |
|                                          | B4     | 1 w.t % Aerosil R974    |                    |                               |
| Effect of Cin-CNCs concentration         | B5     | 0.5 w.t % Aerosil R974  |                    | 0.47                          |
|                                          | B3     |                         | 0.5 w.t % Cin-CNCs |                               |

|                                                |    |                 |                    |      |
|------------------------------------------------|----|-----------------|--------------------|------|
|                                                | B6 |                 | 1 w.t % Cin-CNCs   |      |
| Cin-CNCs/ TiO <sub>2</sub> hollow microspheres | C1 | 0.5 w.t % TX-85 | 0.5 w.t % Cin-CNCs | 0    |
|                                                | C2 |                 |                    | 0.47 |

## 6. The Appearance Photos of Hollow Microspheres Dispersed in Water and Oil

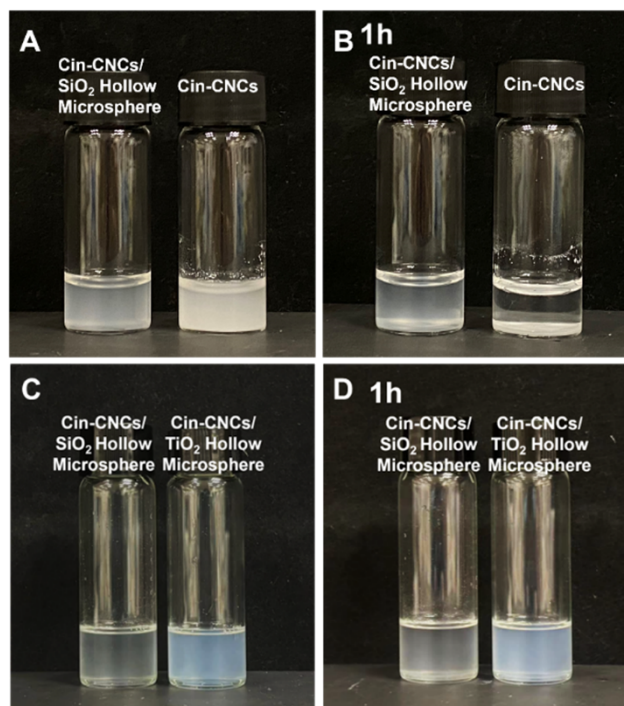

**Figure S4.** Appearance photographs of  $1 \times 10^{-3} \text{ g} \cdot \text{mL}^{-1}$  Cin-CNCs/SiO<sub>2</sub> hollow microspheres and Cin-CNCs in water taken immediately after preparation (A) and after 1 hour (B). The grafting fraction of Cin-CNCs used is 0.47. Appearance photographs of  $1 \times 10^{-3} \text{ g} \cdot \text{mL}^{-1}$  Cin-CNCs/SiO<sub>2</sub> hollow microspheres and Cin-CNCs/TiO<sub>2</sub> hollow microspheres in GTCC taken immediately after preparation (C) and after 1 hour (D). The grafting fraction of Cin-CNCs used is 0.47.

## 7. Sunscreen Formulations for SPF Testing

Table S2. Sunscreens formulation for SPF testing

|           | Ingredients | Concentration (w.t %) |
|-----------|-------------|-----------------------|
| Oil Phase | GTCC        | 37.75                 |
|           | UV filter   | 5                     |
|           | Cetiol 868  | 3.75                  |
|           | Eutanol G   | 4.5                   |

|             |                 |      |
|-------------|-----------------|------|
|             | PGPH            | 0.75 |
|             | Span 83         | 1.5  |
|             | EM 90           | 2.25 |
| Water Phase | water           | 35   |
|             | glycerin        | 5    |
|             | butylene glycol | 4    |
|             | phenoxyethanol  | 0.4  |
|             | 1,2-Octanediol  | 0.1  |
